# Supplementary material for: Selinexor in Combination with Decitabine Attenuates Ovarian Cancer in Mice
Source: MDPI journal article supplement (doi:10.3390/cancers15184541), 2023-09-13

S1A

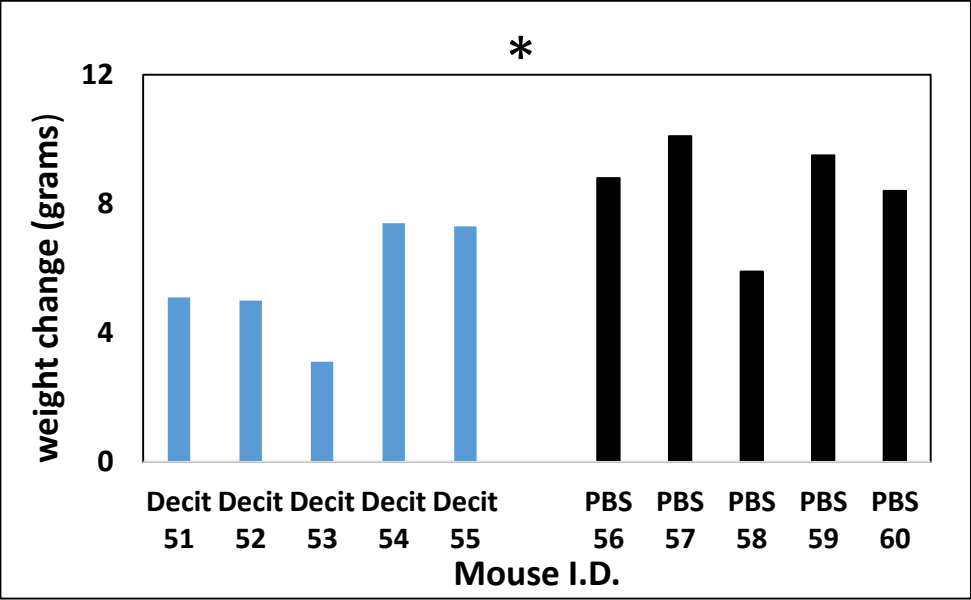

S1B

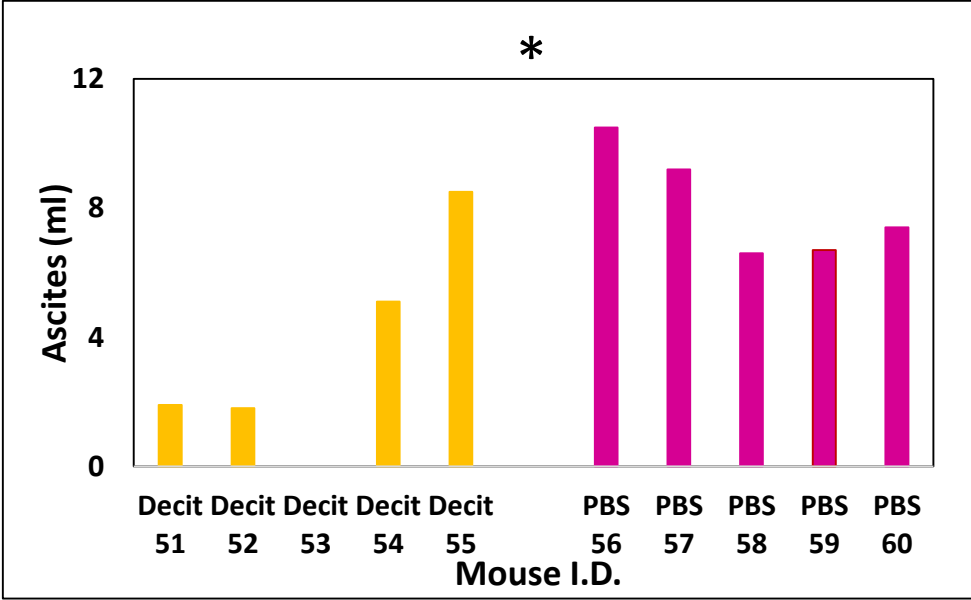

**S2A**  
**Selinexor**

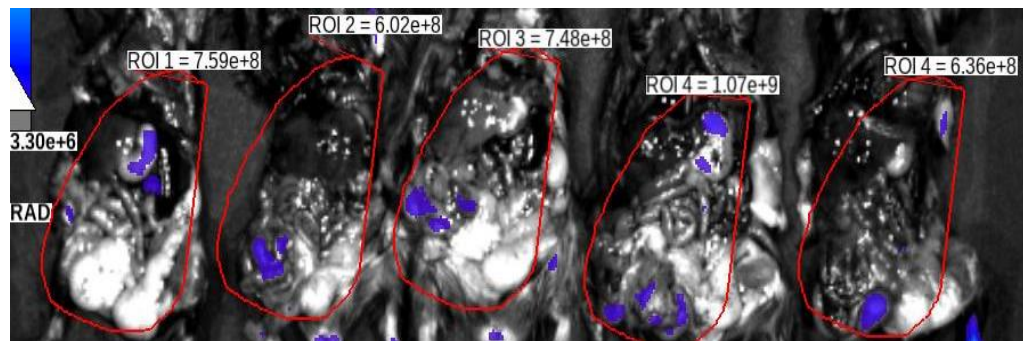

**S2B**  
**Vehicle**

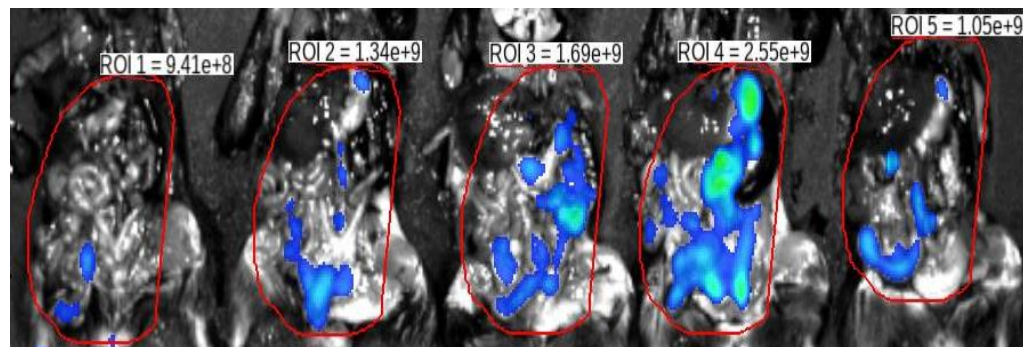

**S2D**  
**Decitabine**

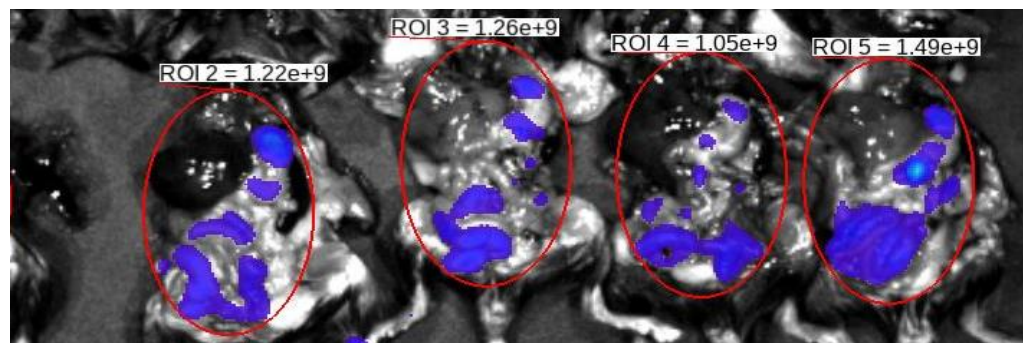

**S2E**  
**PBS**

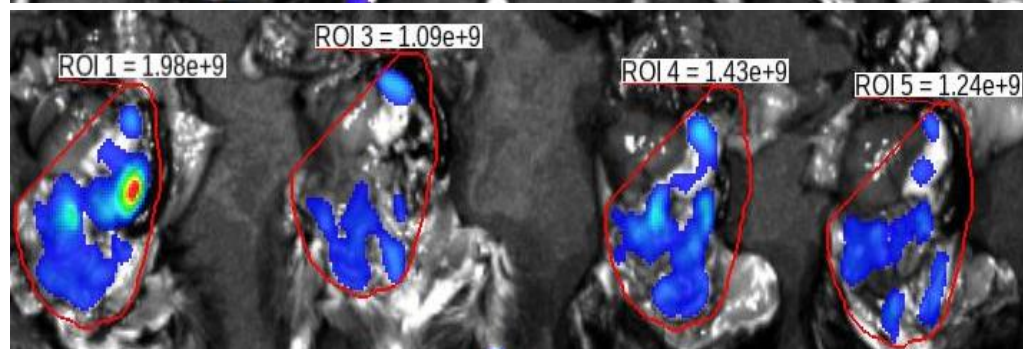

**S2C**

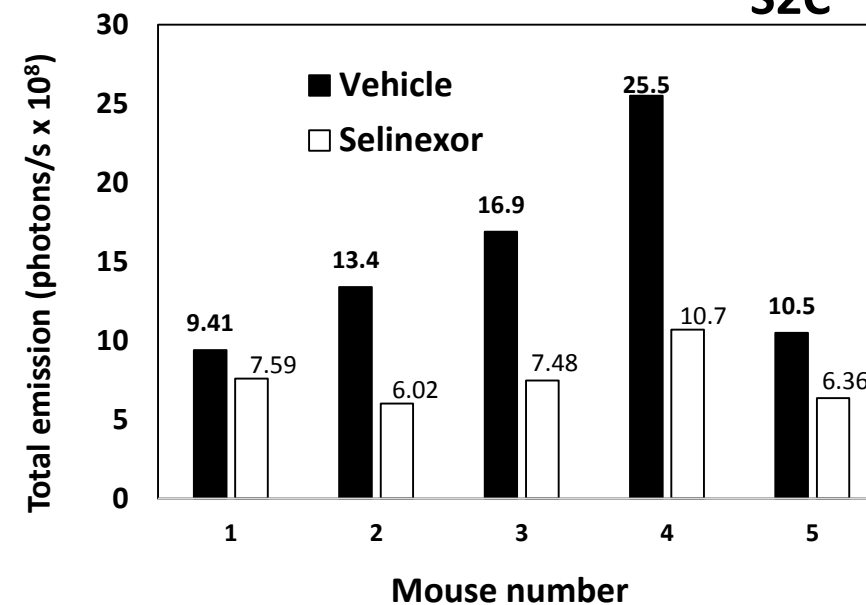

**S2F**

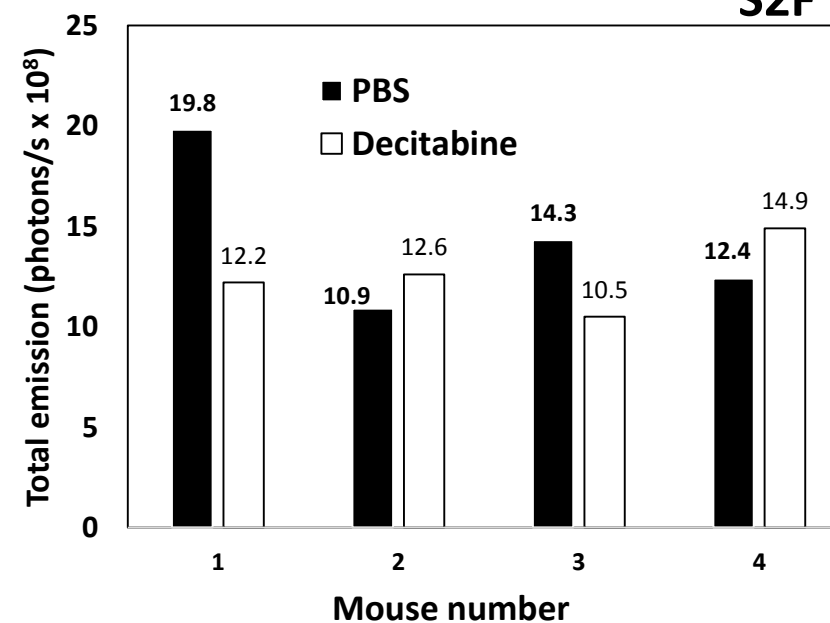

**SELINEXOR**

**S3A**

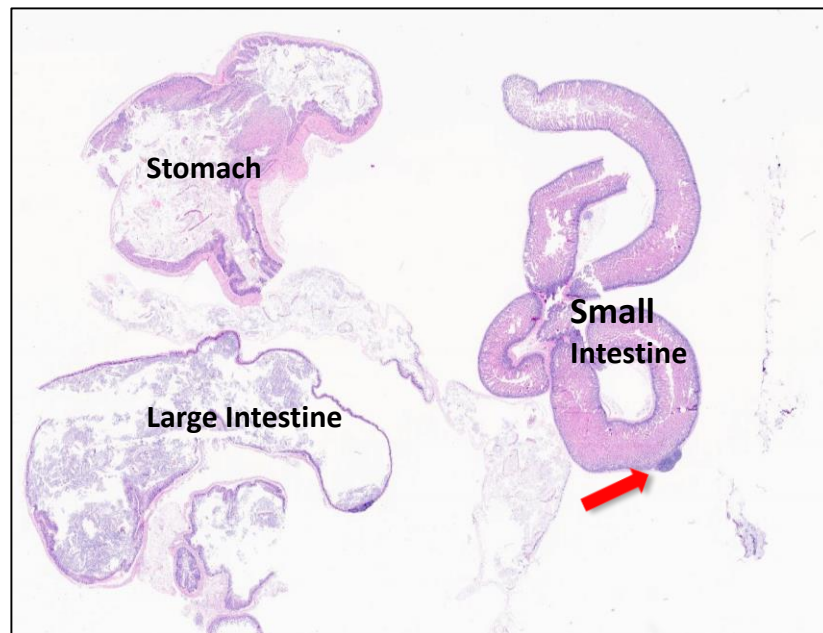

**S3B**

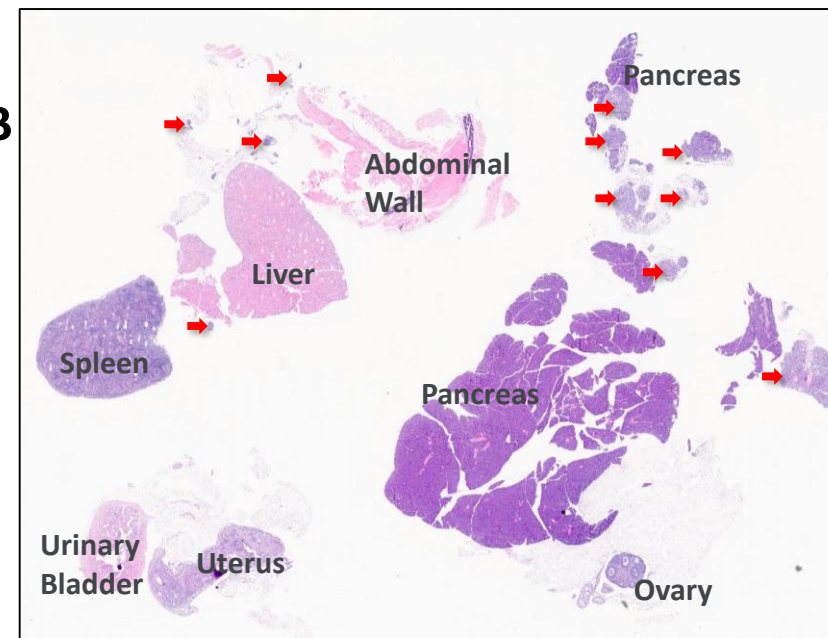

**VEHICLE**

**S3C**

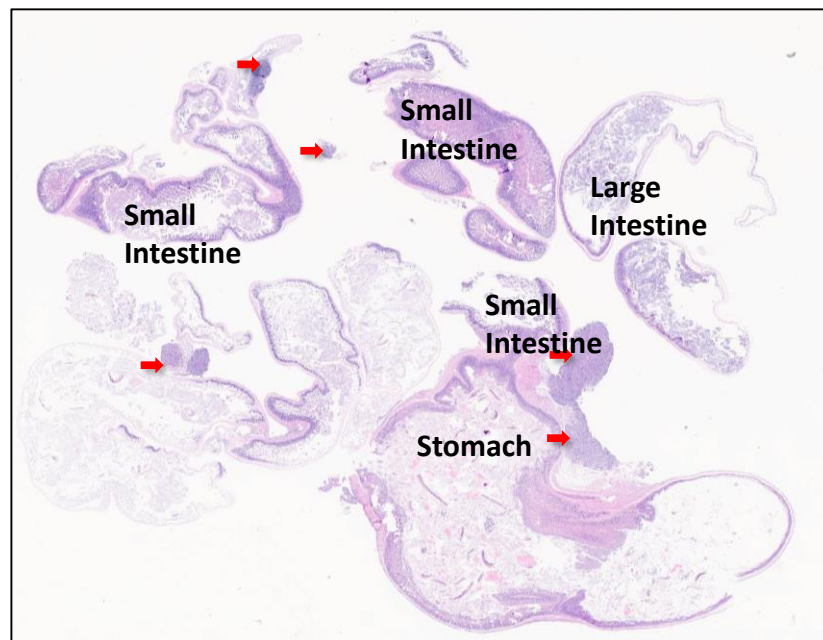

**S3D**

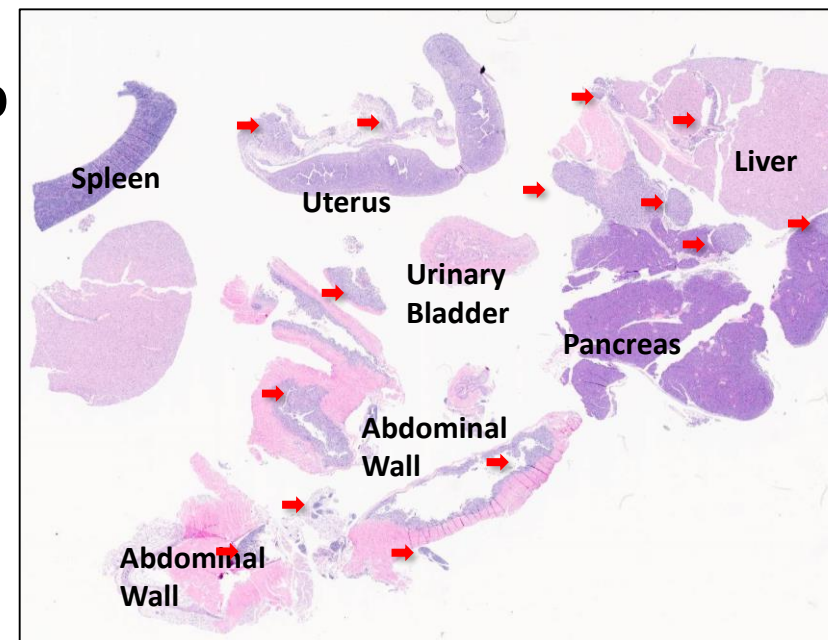



**DECITABINE**

**S3E**

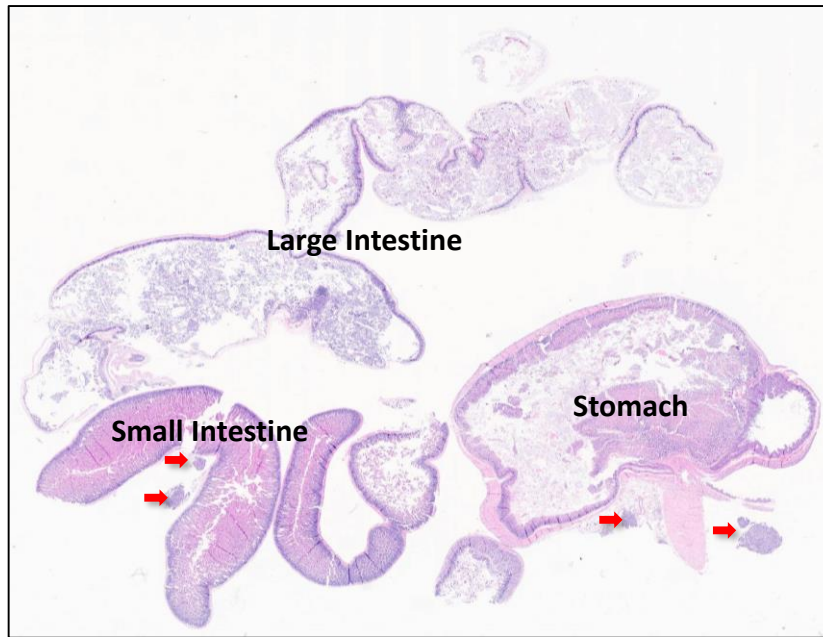

**S3F**

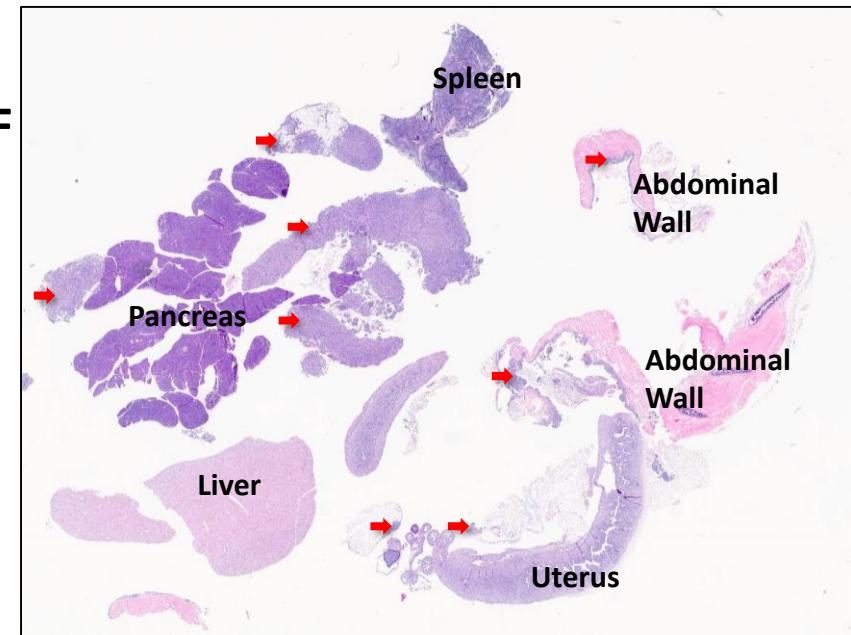

**S3G**

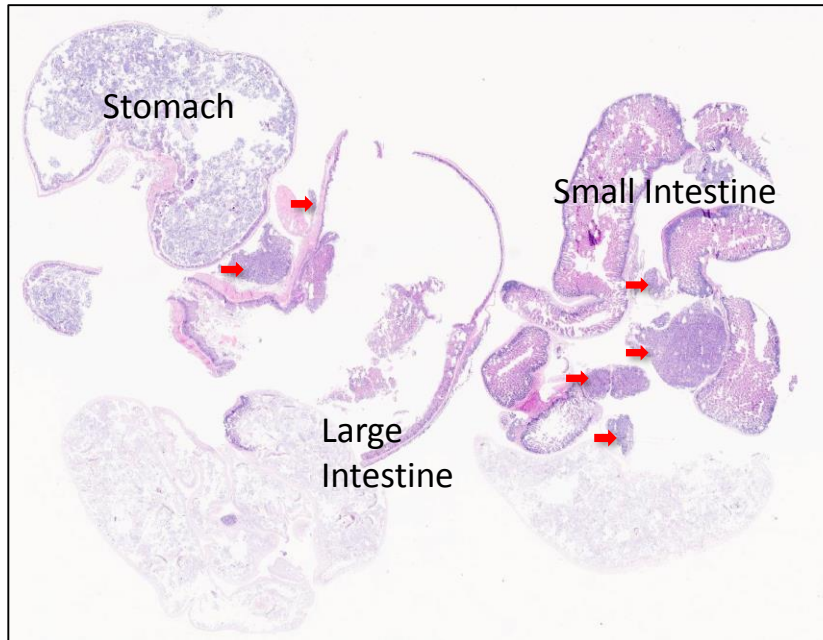

**S3H**

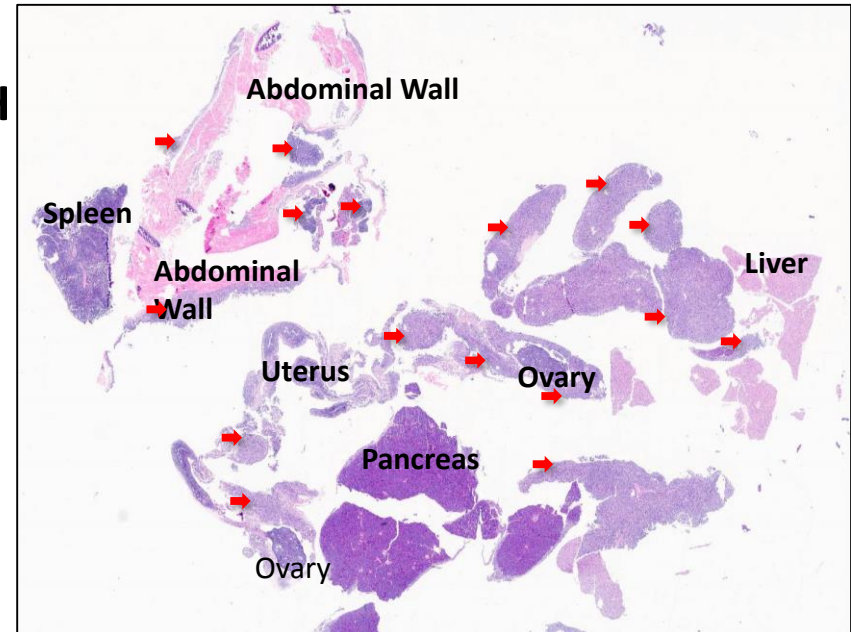

S4

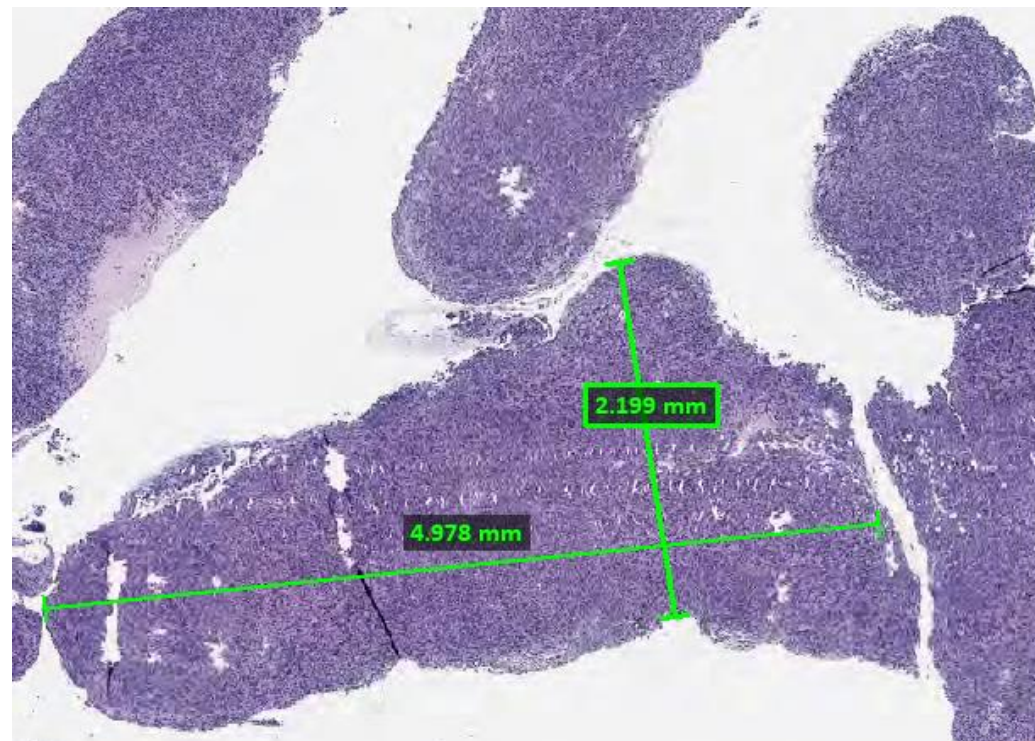

Supplement: s1 [file s1]
